# Supplementary material for: Data in longitudinal randomised controlled trials in cancer pain: is there any loss of the information available in the data? Results of a systematic literature review and guideline for reporting
Source: Springer Nature journal article supplement (doi:10.1186/s12885-016-2818-8), 2016-10-06
Supplement: MOESM1 [file 10822932]

|     |              |                          |                 |   |      |
|-----|--------------|--------------------------|-----------------|---|------|
| 2   | Baczyk       | 2013 unclear             | VAS             | 2 | 177  |
| 3   | Cleeland     | 2013 primary             | BPI             | 2 | 2046 |
| 4   | Hayes        | 2013 primary             | Neuropatic pe   | 3 | 194  |
| 7   | Lauretti     | 2013 secondary           | VAS             | 6 | 72   |
| 8   | Mercadante   | 2013 unclear             | BPI             | 2 | 70   |
| 10  | Wang         | 2013 primary             | VAS             | 2 | 40   |
| 11  | Wong         | 2013 primary             | Wong-Baker I    | 2 | 9    |
| 12  | Yang         | 2013 unclear             | VAS             | 2 | 100  |
| 14  | Ahmedzai     | 2012 primary             | BPI             | 2 | 184  |
| 15  | Batstone     | 2012 secondary           | Likert-scale    | 2 | 44   |
| 16  | Gautam       | 2012 primary             | VAS             | 2 | 239  |
| 19  | Hardy        | 2010 primary & secondary | unknown         | 2 | 185  |
| 25  | Logothetis   | 2012 unclear             | BPI             | 2 | 1196 |
| 26  | Lopez Sendin | 2012 primary             | BPI             | 2 | 24   |
| 28  | Mishra       | 2012 primary             | VAS             | 4 | 120  |
| 31  | Moksnes      | 2012 secondary           | BPI             | 2 | 42   |
| 32  | Portenoy     | 2012 primary             | BPI             | 4 | 360  |
| 33  | Rauck        | 2012 primary             | VAS             | 2 | 98   |
| 34  | Sima         | 2012 primary             | NRS             | 2 | 246  |
| 38  | Yang         | 2012 secondary           | VAS             | 2 | 76   |
| 39  | Yeo          | 2012 secondary           | VAS             | 2 | 102  |
| 41  | Caffo        | 2011 secondary           | BPI             | 2 | 95   |
| 42  | Carvalho     | 2011 secondary           | VAS             | 2 | 70   |
| 43  | Chou         | 2011 secondary           | BPI             | 2 | 68   |
| 45  | Fallon       | 2011 primary & secondary | NRS             | 2 | 84   |
| 47  | Kravitz      | 2011 primary             | medical outcc   | 2 | 307  |
| 48  | LeBlanc      | 2011 primary             | NRS             | 2 | 54   |
| 50  | Moknes       | 2011 primary             | NRS             | 2 | 42   |
| 51  | Oldenmenger  | 2011 primary             | BPI             | 2 | 73   |
| 52  | Oudot        | 2011 primary             | VAS             | 2 | 35   |
| 55  | te Bouvelدت  | 2013 primary & secondary | BPI             | 2 | 210  |
| 56  | Wyse         | 2011 primary & secondary | Lickert-scale   | 2 | 98   |
| 62  | Atahan       | 2010 unclear             | VAS             | 2 | 100  |
| 63  | Benett       | 2010 primary             | NRS             | 2 | 24   |
| 68  | Homsı        | 2010 primary             | 4 point scale   | 2 | 32   |
| 69  | Israel       | 2010 primary             | NRS             | 2 | 31   |
| 70  | Jahn         | 2010 secondary           | unknown         | 2 | 240  |
| 73  | Kroenke      | 2010 primary             | BPI             | 2 | 405  |
| 74  | Leppert      | 2010 primary             | VAS             | 2 | 40   |
| 75  | Lovell       | 2010 secondary           | BPI             | 4 | 217  |
| 76  | Lyon         | 2010 unclear             | BPI             | 3 | 35   |
| 77  | Meuse        | 2010 primary             | unknown         | 2 | 274  |
| 78  | Mercadante   | 2010 primary             | unknown         | 2 | 60   |
| 79  | Nguyen       | 2010 primary             | NRS             | 2 | 40   |
| 82  | Portenoy     | 2010 primary             | NRS             | 2 | 93   |
| 83  | Ridgway      | 2010 secondary           | NRS             | 2 | 41   |
| 86  | Smith        | 2010 secondary           | BPI             | 2 | 89   |
| 88  | Vayne Bossei | 2010 primary             | VAS             | 2 | 18   |
| 92  | Buttler      | 2009 primary             | pain rating sc: | 2 | 124  |
| 94  | Cheville     | 2009 primary & secondary | NRS             | 2 | 28   |
| 100 | Johnson      | 2009 primary & secondary | BPI             | 3 | 65   |
| 101 | Liu          | 2014 unclear             | VAS             | 2 | 26   |
| 102 | Macpherson   | 2015 secondary           | BPI             | 2 | 34   |
| 103 | Yousef       | 2014 primary             | BPI             | 2 | 120  |
| 104 | li           | 2014 primary & secondary | BPI             | 3 | 84   |
| 105 | Thapa        | 2015 primary             | VAS             | 2 | 32   |

|     |           |                            |             |   |     |
|-----|-----------|----------------------------|-------------|---|-----|
| 106 | Chen      | 2013 primary               | NRS         | 2 | 60  |
| 107 | Rief      | 2014 primary and secondary | NA          | 2 | 60  |
| 108 | Salas     | 2014 primary & secondary   | other       | 2 | 200 |
| 109 | William   | 2015 primary & secondary   | BPI         | 2 | 156 |
| 110 | Zeng      | 2014 primary               | VAS         | 2 | 60  |
| 111 | chan      | 2014 secondary             | BPI         | 2 | 174 |
| 112 | Hadjieva  | 2014 primary & secondary   | NRS         | 2 | 38  |
| 113 | Imanaka   | 2014 primary and secondary | NA          | 2 | 100 |
| 114 | Leenstra  | 2014 primary               | other       | 2 | 155 |
| 115 | Kress     | 2014 primary & secondary   | NRS         | 3 | 496 |
| 116 | Nishihara | 2013 primary & secondary   | NRS         | 3 | 37  |
| 117 | Kosugi    | 2014 primary & secondary   | NRS (diary) | 2 | 136 |
| 118 | Huang     | 2014 secondary             | BPI         | 2 | 52  |
| 119 | amr       | 2014 primary               | VAS         | 2 | 119 |
| 120 | Agarwal   | 2015 primary               | VAS (dairy) | 2 | 44  |
| 121 | Khedr     | 2014 primary & secondary   | VAS         | 2 | 34  |
| 122 | Hershman  | 2015 primary & secondary   | BPI         | 2 | 243 |
| 123 | Wang      | 2014 secondary             | NRS         | 2 | 40  |

|                   |     |        |                               |
|-------------------|-----|--------|-------------------------------|
| parallel          | no  | 0 no   | other                         |
| parallel          | no  | 75 no  | other                         |
| placebo/usualcare | no  | 52 no  | longitudinally                |
| placebo/usualcare | no  | 3 no   | longitudinally                |
| parallel          | no  | 4 no   | cross sectionally at each tin |
| placebo/usualcare | no  | 2 no   | longitudinally                |
| placebo/usualcare | no  | 0 no   | other                         |
| placebo/usualcare | no  | 52 no  | cross sectionally at each tin |
| parallel          | no  | 4 no   | cross sectionally at each tin |
| placebo/usualcare | yes | 52 no  | cross sectionally at each tin |
| placebo/usualcare | no  | 7 no   | longitudinally                |
| placebo/usualcare | no  | 1 no   | longitudinally                |
| parallel          | no  | 97 no  | other                         |
| placebo/usualcare | no  | 2 no   | longitudinally                |
| placebo/usualcare | no  | 4 no   | longitudinally                |
| parallel          | no  | 2 no   | cross sectionally at each tin |
| placebo/usualcare | no  | 5 no   | other                         |
| placebo/usualcare | yes | 0 yes  | other                         |
| placebo/usualcare | no  | 1 no   | cross sectionally at each tin |
| parallel          | no  | 260 no | cross sectionally at each tin |
| placebo/usualcare | no  | 26 no  | cross sectionally at each tin |
| parallel          | no  | 0 no   | cross sectionally at each tin |
| parallel          | no  | 4 no   | longitudinally                |
| placebo/usualcare | no  | 4 no   | other                         |
| parallel          | yes | 0 yes  | cross sectionally at each tin |
| placebo/usualcare | no  | 12 no  | longitudinally                |
| parallel          | no  | 14 no  | other                         |
| parallel          | no  | 2 no   | cross sectionally at each tin |
| placebo/usualcare | no  | 9 no   | longitudinally                |
| parallel          | no  | 1 no   | other                         |
| placebo/usualcare | no  | 52 no  | longitudinally                |
| parallel          | no  | 13 no  | longitudinally                |
| parallel          | no  | 26 no  | other                         |
| placebo/usualcare | yes | 0 no   | cross sectionally at each tin |
| parallel          | no  | 1 no   | cross sectionally at each tin |
| placebo/usualcare | yes | 1 no   | other                         |
| placebo/usualcare | no  | 4 no   | longitudinally                |
| placebo/usualcare | no  | 52 no  | longitudinally                |
| parallel          | yes | 2 no   | cross sectionally at each tin |
| placebo/usualcare | no  | 4 no   | longitudinally                |
| placebo/usualcare | no  | 6 no   | longitudinally                |
| parallel          | no  | 12 no  | other                         |
| parallel          | no  | 8 no   | longitudinally                |
| placebo/usualcare | no  | 0 no   | cross sectionally at each tin |
| placebo/usualcare | yes | 0 yes  | cross sectionally at each tin |
| parallel          | yes | 2 no   | other                         |
| placebo/usualcare | no  | 12 no  | longitudinally                |
| placebo/usualcare | yes | 1 no   | longitudinally                |
| parallel          | no  | 52 no  | longitudinally                |
| placebo/usualcare | yes | 8 no   | cross sectionally at each tin |
| parallel          | no  | 8 no   | cross sectionally at each tin |
| placebo/usualcare | yes | 2 no   | longitudinally                |
| placebo/usualcare | no  | 8 no   | other                         |
| placebo/usualcare | no  | 4 no   | cross sectionally at each tin |
| parallel          | no  | 26 no  | cross sectionally at each tin |
| parallel          | no  | 13 no  | cross sectionally at each tin |

|                   |     |       |                               |
|-------------------|-----|-------|-------------------------------|
| placebo/usualcare | no  | 1 no  | cross sectionally at each tin |
| placebo/usualcare | no  | 13 no | longitudinally                |
| placebo/usualcare | no  | 2 no  | longitudinally                |
| placebo/usualcare | no  | 13 no | longitudinally                |
| parallel          | no  | 0 no  | other                         |
| parallel          | no  | no    | cross sectionally at each tin |
| parallel          | no  | 0 no  | cross sectionally at each tin |
| parallel          | no  | 8 no  | other                         |
| placebo/usualcare | yes | 0 no  | longitudinally                |
| placebo/usualcare | no  | 4 no  | other                         |
| parallel          | no  | 2 no  | other                         |
| placebo/usualcare | yes | 0 yes | cross sectionally at each tin |
| parallel          | no  | 13 no | cross sectionally at each tin |
| parallel          | no  | 65 no | cross sectionally at each tin |
| parallel          | no  | 16 no | longitudinally                |
| placebo/usualcare | no  | 4 no  | longitudinally                |
| placebo/usualcare | no  | 24 no | other                         |
| placebo/usualcare | no  | 1 no  | longitudinally                |

|                                      |               |              |     |               |
|--------------------------------------|---------------|--------------|-----|---------------|
|                                      | no            | prop         | yes | dif from base |
| dichotomised                         | N/A           | HR-CI        | yes | dicho         |
| GEE                                  | N/A           | m-CI         | yes | time point    |
| repeated measure ANOVA               | N/A           | nothing      | no  |               |
| other                                | no            | msd          | yes | dif from base |
| repeated measure ANOVA               | no            | msd-F-values | yes |               |
| aggregated for all measures Pre/Post | no            | msd          | yes |               |
| t-Test                               | no            | msd          | yes |               |
| NA                                   | no            | mdiff-CI     | yes | cov           |
| t-Test                               | no            | msd          | no  |               |
| other                                | N/A           | F-values     | no  |               |
| mixed model                          | no            | msd-CI       | yes |               |
| dichotomised, time to event          | no            | HR-CI        | yes | dicho         |
| repeated measure ANOVA               | yes           | F-values     | yes | time point    |
| repeated measure ANOVA               | yes           | F-values     | yes |               |
| other                                | no            | msd-CI       | yes |               |
| dichotomised                         | no            | or           | yes | dicho         |
| aggregated                           | yes           | msd          | yes | cov           |
| ANOVA                                | no            | msd          | yes | dif from base |
| t-Test                               | no            | msd          | yes |               |
| t-Test                               | no            | nothing      | yes |               |
| other                                | unclear/ unkn | chgbas       | yes | dif from base |
| AUC                                  | N/A           | nothing      | no  |               |
| not analysed as outcome              | N/A           | coef-se      | yes |               |
| ANOVA                                | no            | msd          | yes | dif from base |
| mixed model                          | N/A           | coef-se      | yes | cov           |
| aggregated + dichotomised            | unclear/ unkn | logrank      | yes | dicho         |
| other                                | unclear/ unkn | mdiff-CI     | yes |               |
| other                                | N/A           | mean         | yes | dif from base |
| aggregated                           | no            | msd          | no  |               |
| repeated measure ANOVA               | N/A           | Protocol     | yes |               |
| GEE                                  | no            | chgbas       | yes | dicho         |
| time to event                        | no            | prop         | yes |               |
| other                                | no            | msd          | yes | dif from base |
| other                                | no            | nothing      | yes |               |
| aggregated                           | N/A           | F-values     | no  |               |
| mixed model                          | no            | Protocol     | yes |               |
| mixed model                          | N/A           | nothing      | yes | cov           |
| t-Test                               | no            | msd          | yes |               |
| GEE                                  | N/A           | msd          | yes | cov           |
| mixed model                          | N/A           | miqr         | yes |               |
| used to calculate responses          | N/A           | prop         | yes | dicho         |
| repeated measure ANOVA               | N/A           | nothing      | yes |               |
| other                                | no            | cohen        | yes |               |
| ANOVA                                | no            | msd          | yes | dif from base |
| aggregated                           | yes           | msd-CI       | yes | cov           |
| mixed model                          | N/A           | t-values     | yes |               |
| repeated measure ANOVA               | N/A           | msd          | yes |               |
| other                                | no            | m-prop       | yes | time point    |
| other                                | N/A           | mean         | yes | dif from base |
| other                                | no            | msd          | yes | dif from base |
| repeated measure ANOVA               | N/A           | msd          | yes | N/A           |
| aggregated                           | N/A           | nothing      | yes | dif from base |
| t-Test                               | no            | msd          | yes | dif from base |
| t-Test                               | no            | nothing      | yes | N/A           |
| t-Test                               | no            | propt        | yes | dif from base |

|                                       |     |          |         |                |
|---------------------------------------|-----|----------|---------|----------------|
| t-Test                                | yes | msd      | yes     | diff from base |
| repeated measure ANOVA                | NA  | msd      | yes     | NA             |
| repeated measure ANOVA<br>mixed model | no  | Protocol | yes     | time point     |
| chi-squared-test                      | yes | msd      | yes     | cov            |
| t-Test                                | no  | propt    | yes     | N/A            |
| ANOVA                                 | no  | nothing  | unclear |                |
|                                       | no  | msd      | yes     | diff from base |
|                                       | NA  | propt    | yes     | dicho          |
| AUC                                   | yes | nothing  | yes     | time point     |
| odds ratio                            | N/A | OR       | yes     | N/A            |
| non-parametric test                   | no  | msd      | yes     | diff from base |
| t-Test                                | no  | msd      | yes     | N/A            |
| ANOVA                                 | no  | msd      | yes     | N/A            |
| t-Test                                | no  | msd      | yes     | dif from base  |
| repeated measure ANOVA                | NA  | msd      | yes     | time point     |
| repeated measure ANOVA                | N/A | msd      | yes     | cov            |
| t-Test                                | N/A | none     | yes     | diff from base |
| GEE                                   | NA  | nothing  | yes     | time point     |

yes  
yes  
yes  
no  
yes  
unclear/ unknown  
unclear/ unknown  
no  
yes  
N/A  
N/A  
unclear/ unknown  
yes  
yes  
unclear/ unknown  
no  
yes  
yes  
yes  
no  
unclear/ unknown  
yes  
unclear/ unknown  
NA  
yes  
yes  
yes  
no  
yes  
no  
unclear/ unknown  
yes  
no  
yes  
no  
N/A  
unclear/ unknown  
yes  
no  
yes  
unclear/ unknown  
yes  
unclear/ unknown  
no  
yes  
yes  
unclear/ unknown  
no  
yes  
yes  
yes  
unclear/ unknown  
yes  
yes  
no  
yes

yes

NA

yes

yes

no

unclear/ unknown

yes

yes

yes

no

yes

no

no

yes

yes

yes

yes

yes
